# Supplementary material for: Tracking Antimicrobial Resistant E. coli from Pigs on Farm to Pork at Slaughter
Source: MDPI journal article supplement (doi:10.3390/microorganisms10081485), 2022-07-23
Supplement: s1 [file s1]

**Table S1.** Antibiotics applied at the respective farms during the study period, but not in study animals.

| Antibiotic                         | Farm    | Production mode       |
|------------------------------------|---------|-----------------------|
| amoxicillin-trihydrate             | E5      | conventional          |
| benzylpenicillin-benzathin         | E5      | conventional          |
| benzylpenicillin-procain           | E5      | conventional          |
| cefquinome-sulfate                 | E5, J20 | conventional, organic |
| chlortetacycline-hydrochlorid      | E5, J20 | conventional, organic |
| dihydrostreptomycin-sulfate        | E5      | conventional          |
| enrofloxacin                       | E5      | conventional          |
| florfenicol                        | A6      | conventional          |
| lincomycinhydrochlorid-monohydrate | E5      | conventional          |
| spectinomycin-sulfate-tetrahydrate | E5      | conventional          |
| sulfadimidin + trimethoprim        | J20     | organic               |
| sulfadoxin                         | E5      | conventional          |
| sulfathiazine + trimethoprim       | J20     | organic               |
| tildipirosin                       | E5      | conventional          |
| tylosin-phosphate                  | A21     | conventional          |
