# Supplementary material for: Tracking Antimicrobial Resistant E. coli from Pigs on Farm to Pork at Slaughter
Source: MDPI journal article supplement (doi:10.3390/microorganisms10081485), 2022-07-23
Supplement: s1 [file s1]

**Table S3.** Target genes, fragment size and annealing temperature of the primers used for MLST-PCR

| Number* | Primer<br>FW/RV              | Target gen                                      | Fragment<br>size (bp) | Annealing<br>temperature (°C) |
|---------|------------------------------|-------------------------------------------------|-----------------------|-------------------------------|
| 1       | <i>adkF</i><br><i>adkR</i>   | Adenylate kinase                                | 583                   | 54                            |
| 6       | <i>fumCF</i><br><i>fumCR</i> | Fumarate hydratase                              | 806                   | 54                            |
| 7       | <i>gyrBF</i><br><i>gyrBR</i> | DNA gyrase                                      | 911                   | 60                            |
| 8       | <i>icdF</i><br><i>icdR</i>   | Isocitrate/<br>isopropylmalate<br>dehydrogenase | 878                   | 54                            |
| 9       | <i>mdhF</i><br><i>mdhR</i>   | Malate dehydrogenase                            | 932                   | 60                            |
| 10      | <i>purAF</i><br><i>purAR</i> | Adenylosuccinate<br>dehydrogenase               | 816                   | 54                            |
| 13      | <i>recAF</i><br><i>recAR</i> | ATP/GTP binding site                            | 780                   | 58                            |

\* According to table S2
