# Supplementary material for: Tracking Antimicrobial Resistant E. coli from Pigs on Farm to Pork at Slaughter
Source: MDPI journal article supplement (doi:10.3390/microorganisms10081485), 2022-07-23
Supplement: s1 [file s1]

**Table S2.** Overview of the primers used as well as their sequences and reference data.

| No. | Primer FW/<br>RW                                                           | Target Gen                                      | Sequence (Direction 5'-3')                                                      | Sources                                                                       |
|-----|----------------------------------------------------------------------------|-------------------------------------------------|---------------------------------------------------------------------------------|-------------------------------------------------------------------------------|
| 1   | <i>adkF</i><br><i>adkR</i>                                                 | Adenylate kinase                                | ATTCTGCTTGCGCTCCGGG<br>CCGTCAACTTTCGCGTATTT                                     | <a href="http://mlst.warwick.ac.uk/mlst/">http://mlst.warwick.ac.uk/mlst/</a> |
| 2   | AMPC FW<br>AMPC RV                                                         | Chromosomal<br>encoded <i>ampC</i>              | GATCGTTCTGCCGCTGTG<br>GGGCAGCAAATGTGGAGCAA                                      | Corvec et al. 2007                                                            |
| 3   | <i>bla</i> <sub>CTX-M</sub> U<br>FW<br><i>bla</i> <sub>CTX-M</sub> U<br>RV | Conserved <i>bla</i> <sub>CTX-M</sub><br>region | ATGTGCAGYACCAGTAARGT<br><br>TGGGTRAARTARGTSACCAGA                               | Pagani et al. 2003                                                            |
| 4   | Com1<br>R789                                                               | 16s-rRNA-Genes                                  | CAGCAGCCGCGGTAATAC<br>ATCCTGTTTGMTMCCCVCR                                       | Schwieger et al. 1998                                                         |
| 5   | ERIC 1 FW<br><br>ERIC 2 RV                                                 | ERIC                                            | ATGTAAGCTCCTGGGGATTAC<br><br>AAGTAAGTGAAGTGGGGTGAGCG                            | Dorn-In et al. 2015<br>Versalovic et al. 1991<br>Chia et al. 2005             |
| 6   | <i>fumCF</i><br><i>fumCR</i>                                               | Fumarate<br>hydratase                           | TCACAGGTCGCCAGCGCTTC<br>GTACGCAGCGAAAAAGATT                                     | <a href="http://mlst.warwick.ac.uk/mlst/">http://mlst.warwick.ac.uk/mlst/</a> |
| 7   | <i>gyrBF</i><br><i>gyrBR</i>                                               | DNA gyrase                                      | TCGGCGACACGGATGACGGC<br>ATCAGGCCTTCACGCGCATC                                    | <a href="http://mlst.warwick.ac.uk/mlst/">http://mlst.warwick.ac.uk/mlst/</a> |
| 8   | <i>icdF</i><br><br><i>icdR</i>                                             | Isocitrate/<br>isopropylmalate<br>dehydrogenase | ATGGAAGTAAAGTAGTTGTTCCGG<br>CACA<br>GGACGCAGCAGGATCTGTT                         | <a href="http://mlst.warwick.ac.uk/mlst/">http://mlst.warwick.ac.uk/mlst/</a> |
| 9   | <i>mdhF</i><br><br><i>mdhR</i>                                             | Malate<br>dehydrogenase                         | ATGAAAGTCGCAGTCCTCGGCGCTG<br>CTGGCGG<br>TTAACGAACTCCTGCCCCAGAGCGA<br>TATCTTTCTT | <a href="http://mlst.warwick.ac.uk/mlst/">http://mlst.warwick.ac.uk/mlst/</a> |
| 10  | <i>purAF</i><br><i>purAR</i>                                               | Adenylosuccinate<br>dehydrogenase               | CGCGCTGATGAAAGAGATGA<br>CATACGGTAAGCCACGCAGA                                    | <a href="http://mlst.warwick.ac.uk/mlst/">http://mlst.warwick.ac.uk/mlst/</a> |
| 11  | <i>qacEaII</i> FW<br><i>qacEaII</i> RV                                     | <i>qacE</i> / <i>qacEΔ1</i>                     | CGCATTTTATTTTCTTCTCTGGTT<br>CCCGACCAGACTGCATAAGC                                | Jechalke et al. 2014                                                          |
| 12  | <i>qacEΔ1</i> FW<br><i>qacEΔ1</i> RV                                       | <i>qacEΔ1</i>                                   | GGCTTTACTAAGCTTGCCCC<br>AGCCCCATACCTACAAAGCC                                    | Bischoff et al. 2012                                                          |
| 13  | <i>recAF</i><br><i>recAR</i>                                               | ATP/GTP binding<br>site                         | CGCATTCGCTTTACCCTGACC<br>TCGTGAAATCTACGGACCGGA                                  | <a href="http://mlst.warwick.ac.uk/mlst/">http://mlst.warwick.ac.uk/mlst/</a> |
| 14  | <i>str(A)</i> FW<br><i>str(A)</i> RV                                       | <i>str(A)</i>                                   | CCTGGTGATAACGGCAATTC<br>CCAATCGCAGATAGAAGGC                                     | Lanz et al. 2003                                                              |
| 15  | <i>str(B)</i> FW<br><i>str(B)</i> RV                                       | <i>str(B)</i>                                   | ATCGTCAAGGGATTGAAACC<br>GGATCGTAGAACATATTGGC                                    | Lanz et al. 2003                                                              |
| 16  | <i>sul(I)</i> FW<br><i>sul(I)</i> RV                                       | <i>sul(I)</i>                                   | TTCGGCATTCTGAATCTCAC<br>ATGATCTAACCCTCGGTCTC                                    | Maynard et al. 2003                                                           |
| 17  | <i>sul(II)</i> FW<br><i>sul(II)</i> RV                                     | <i>sul(II)</i>                                  | CGGCATCGTCAACATAACC<br>GTGTGCGGATGAAGTCAG                                       | Maynard et al. 2003                                                           |
| 18  | <i>tet(A)</i> FW<br><i>tet(A)</i> RV                                       | <i>tet(A)</i>                                   | GTGAAACCCAAACATACCCC<br>GAAGGCAAGCAGGATGTAG                                     | Maynard et al. 2003                                                           |
| 19  | <i>tet(B)</i> FW<br><i>tet(B)</i> RV                                       | <i>tet(B)</i>                                   | TACGTGAATTTATTGTTCCGG<br>ATACAGCATCCAAAGCGCAC                                   | Aminov et al. 2002                                                            |
| 20  | <i>tet(M)</i> FW<br><i>tet(M)</i> RV                                       | <i>tet(M)</i>                                   | ACAGAAAGCTTATTATATAAC<br>TGGCGTGTCTATGATGTTAC                                   | Aminov et al. 2001                                                            |
